# Supplementary material
Source: PubMed Central journal article supplement (PMC5571643)

**Table E1. Incidence of CMH in Patients with Mild TBI Who Underwent Imaging at Different Stages**

| Time Since Injury | All Participants with Mild TBI | Patients with Mild TBI and CMH | Percentage of Patients with Mild TBI and CMH |
|-------------------|--------------------------------|--------------------------------|----------------------------------------------|
| <3 mo             | 17                             | 2                              | 11.8                                         |
| 3-6 mo            | 34                             | 2                              | 5.9                                          |
| 6-12 mo           | 68                             | 2                              | 2.9                                          |
| >1 y              | 440                            | 11                             | 2.5                                          |
| Total             | 559                            | 17                             | 3.0                                          |

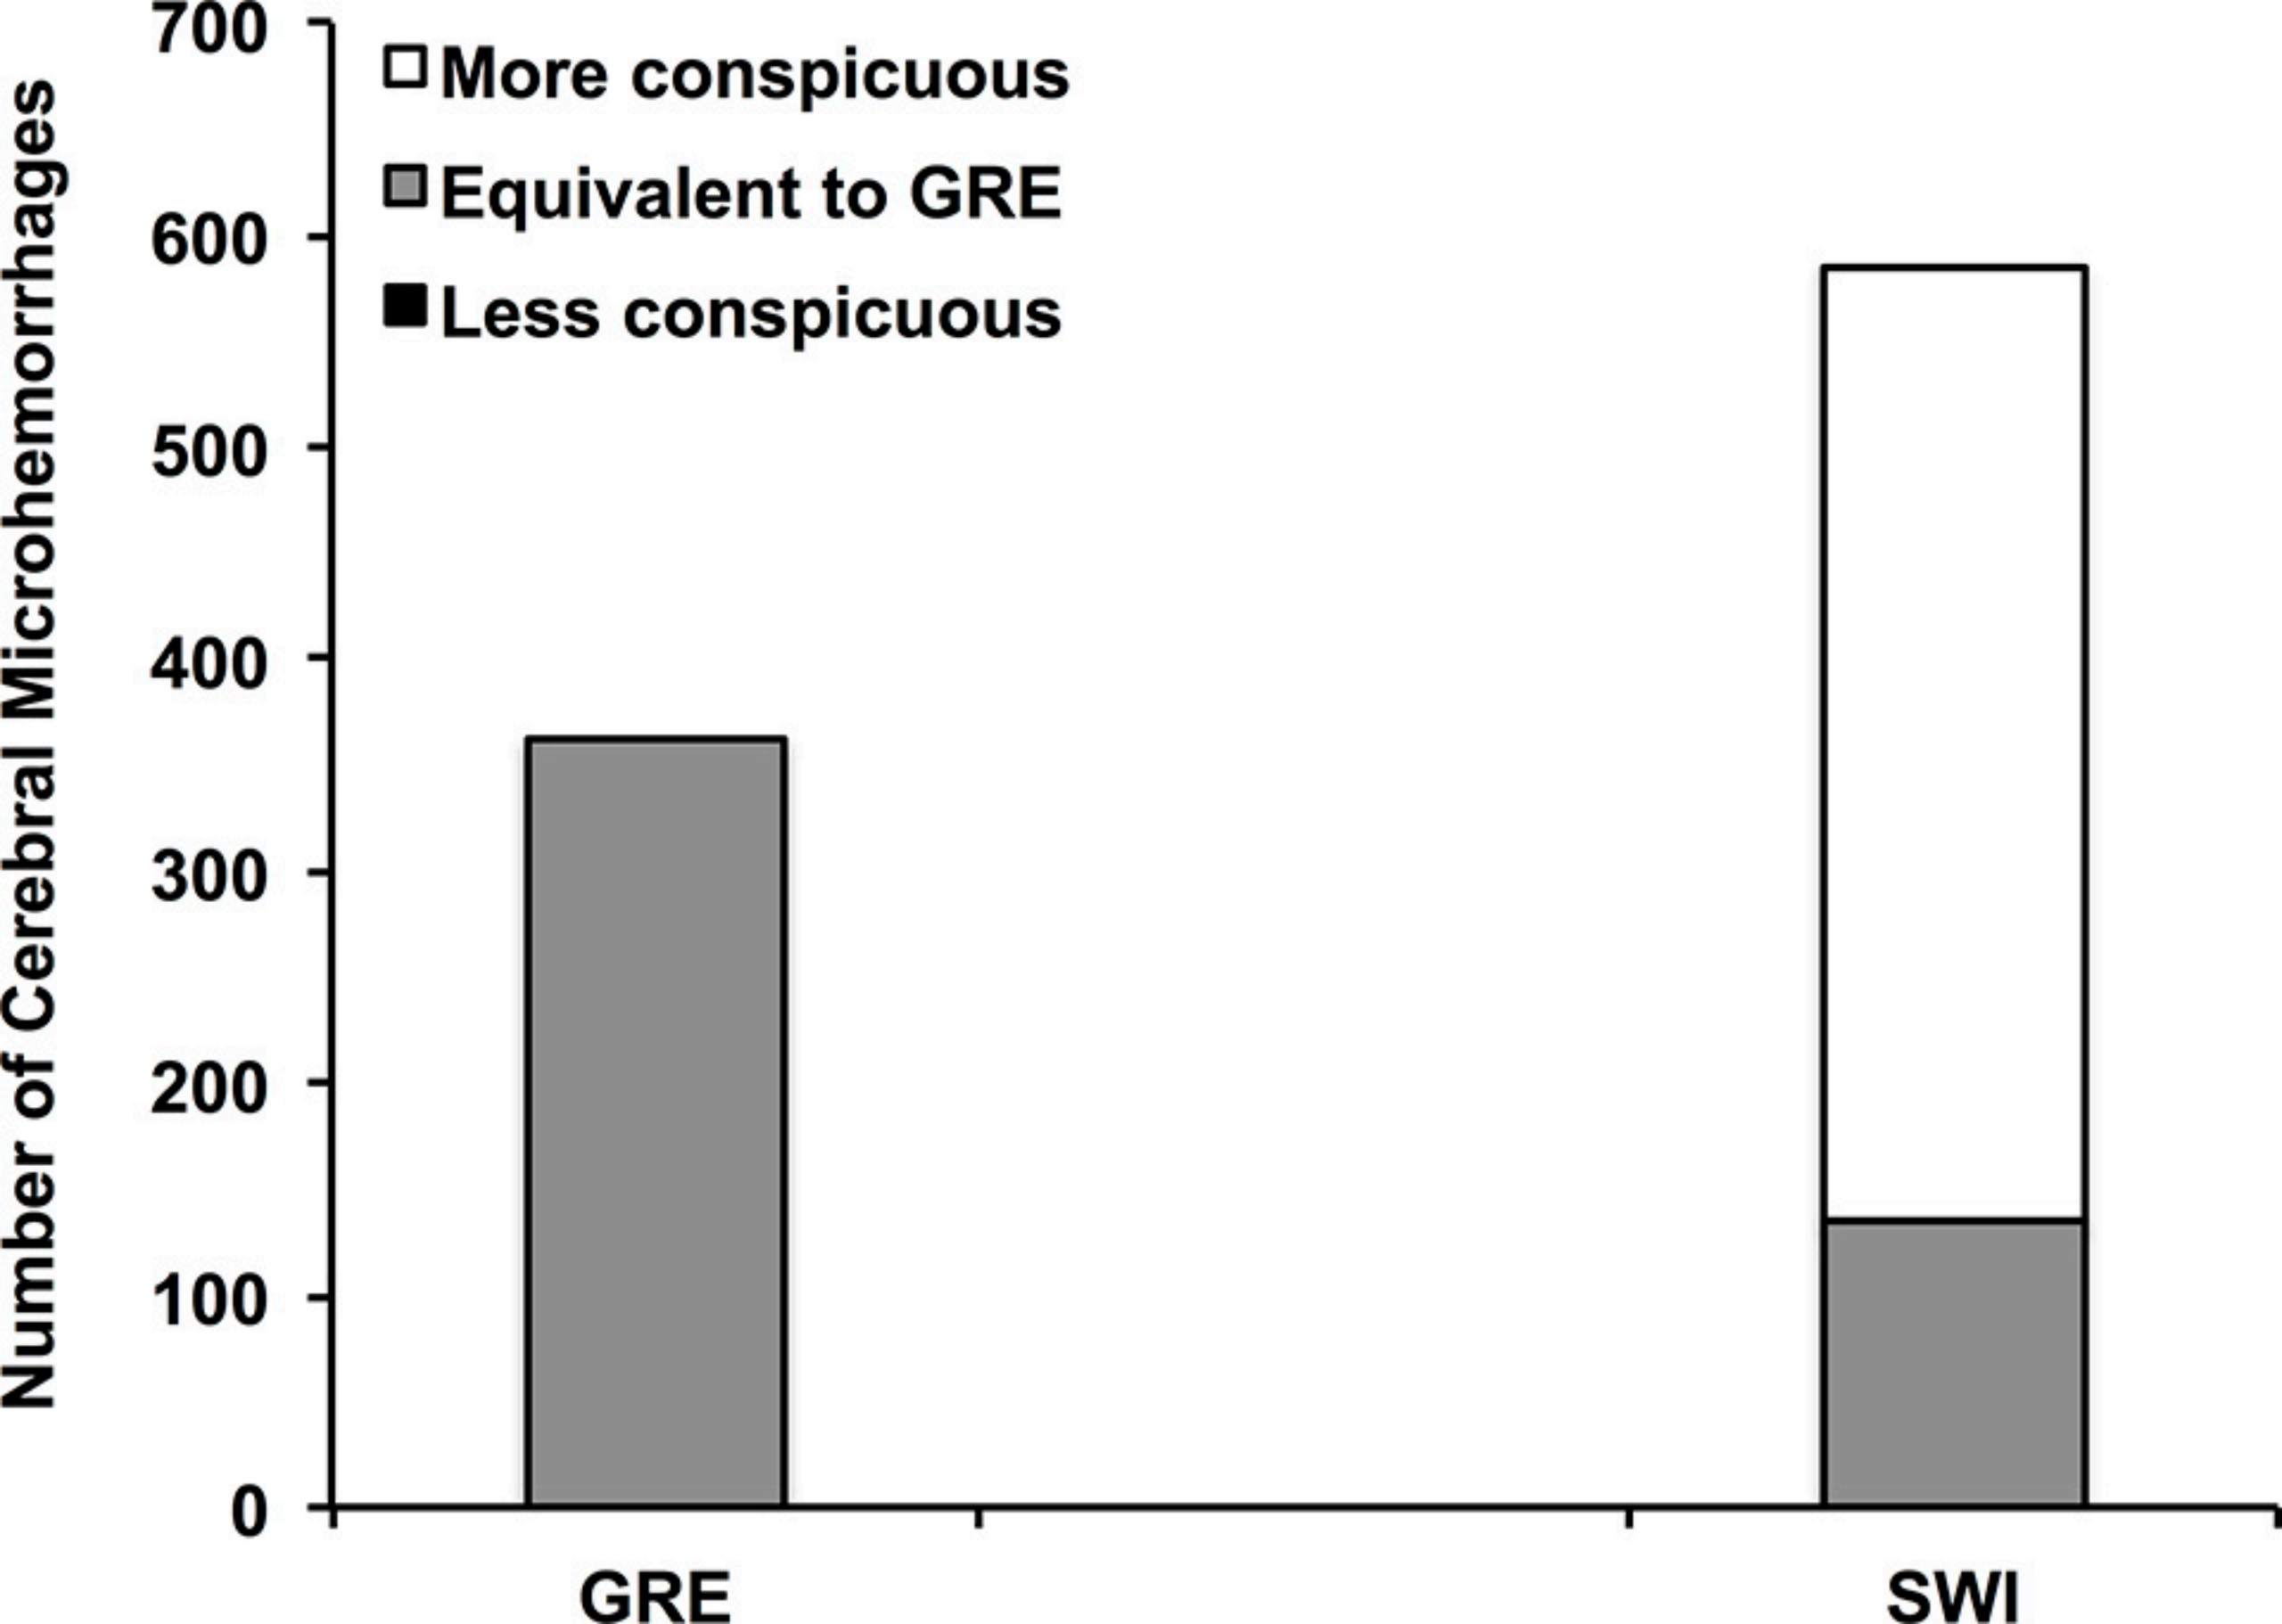

a

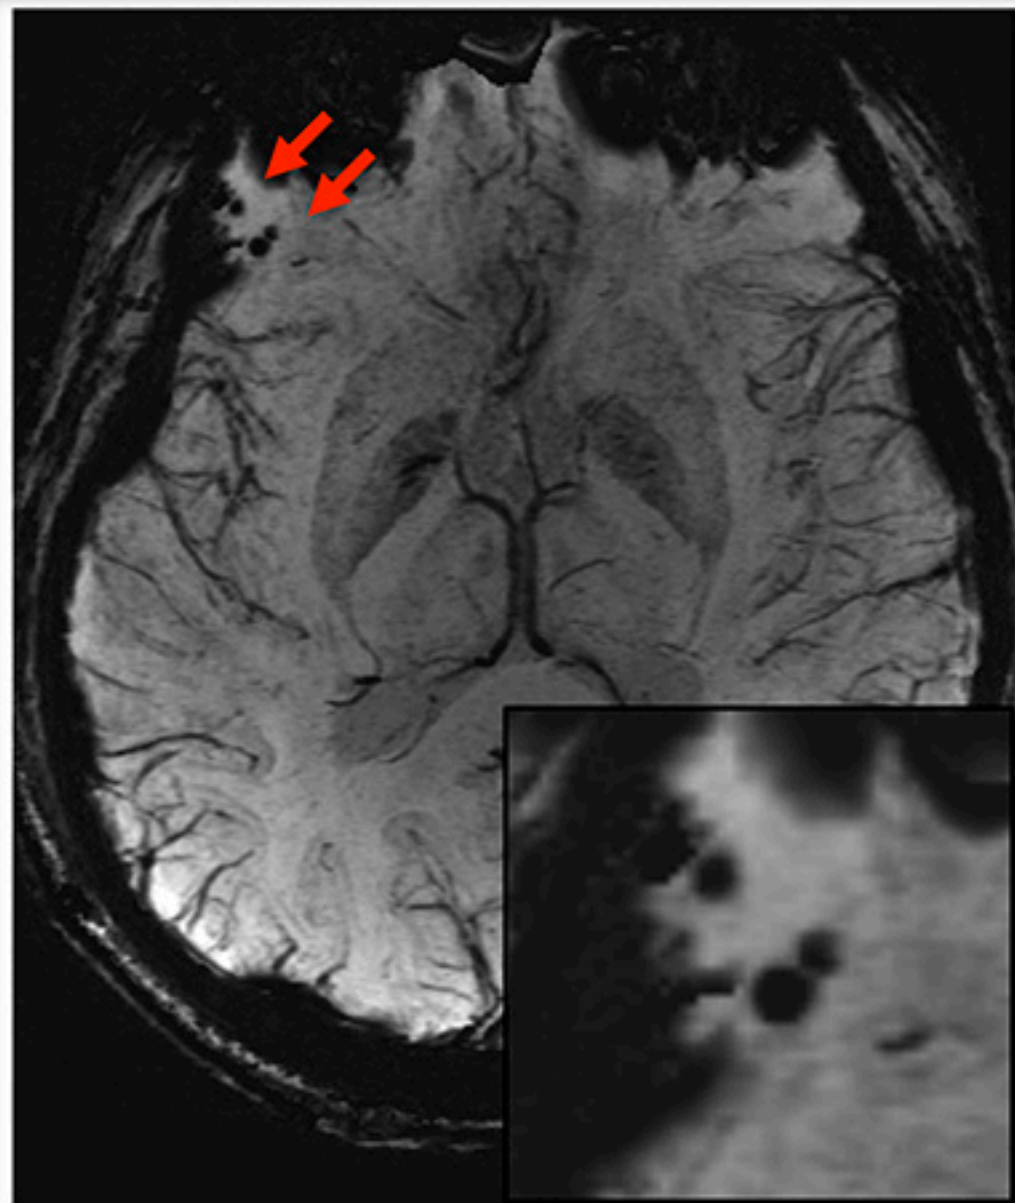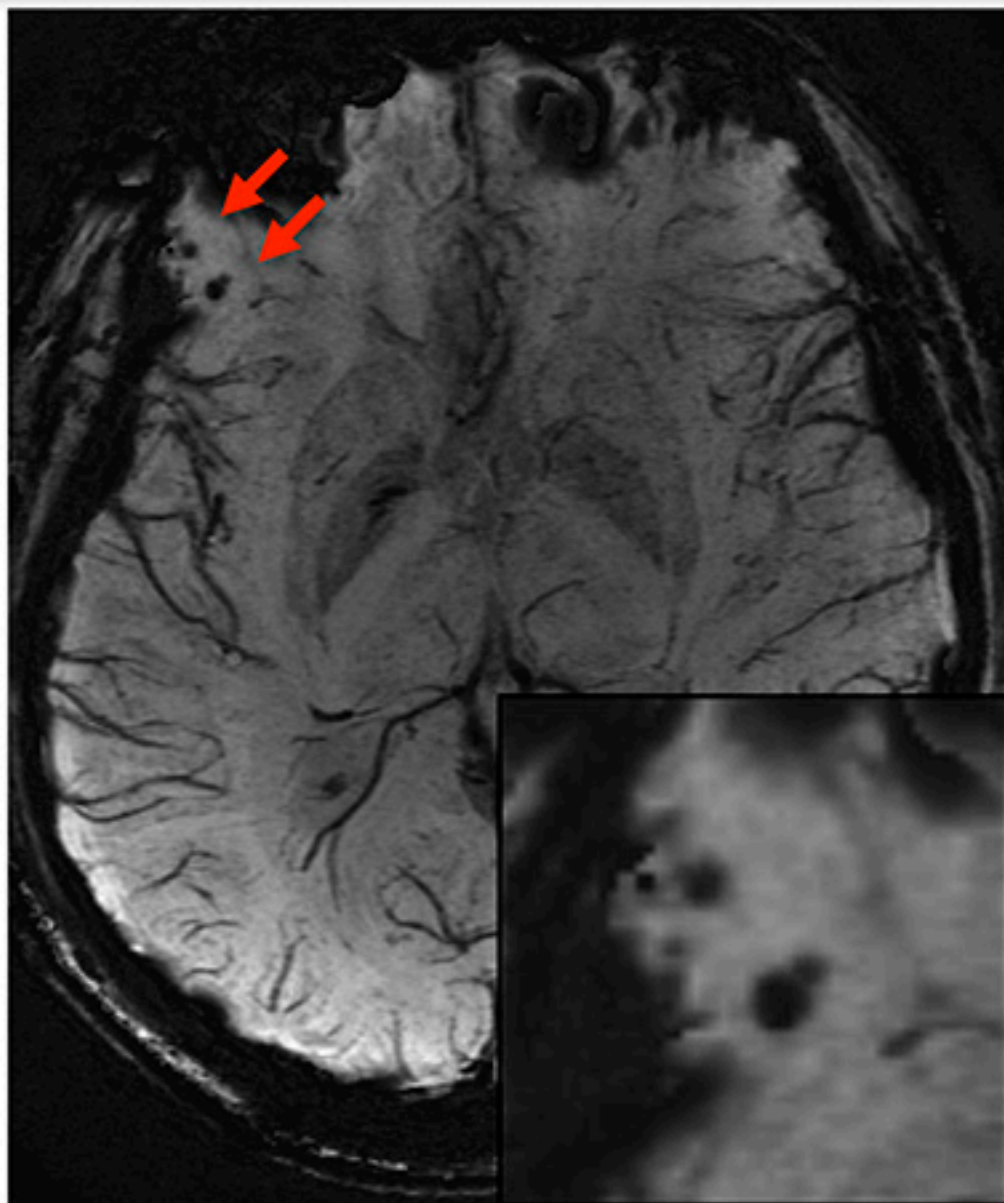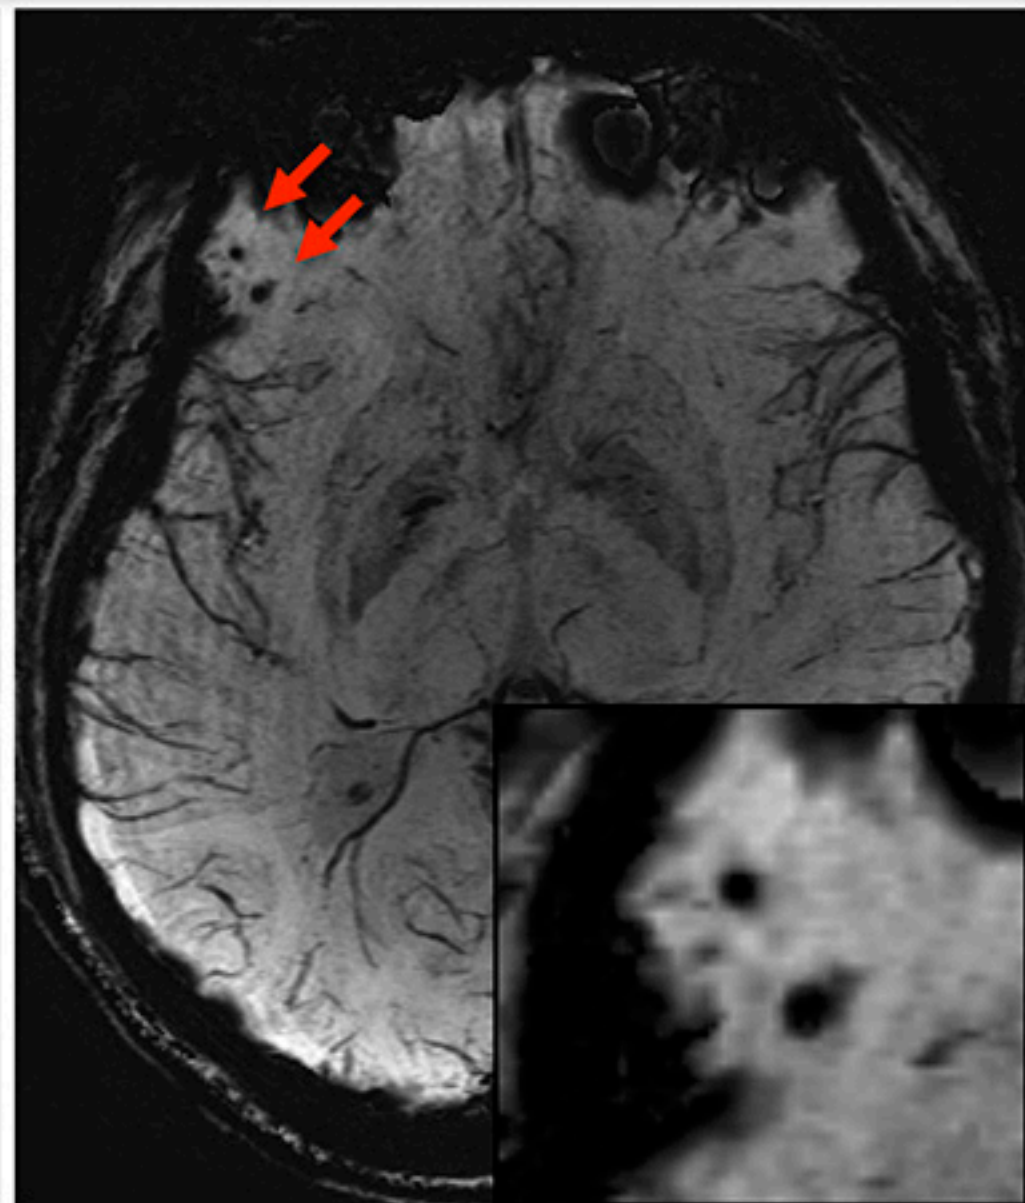

b

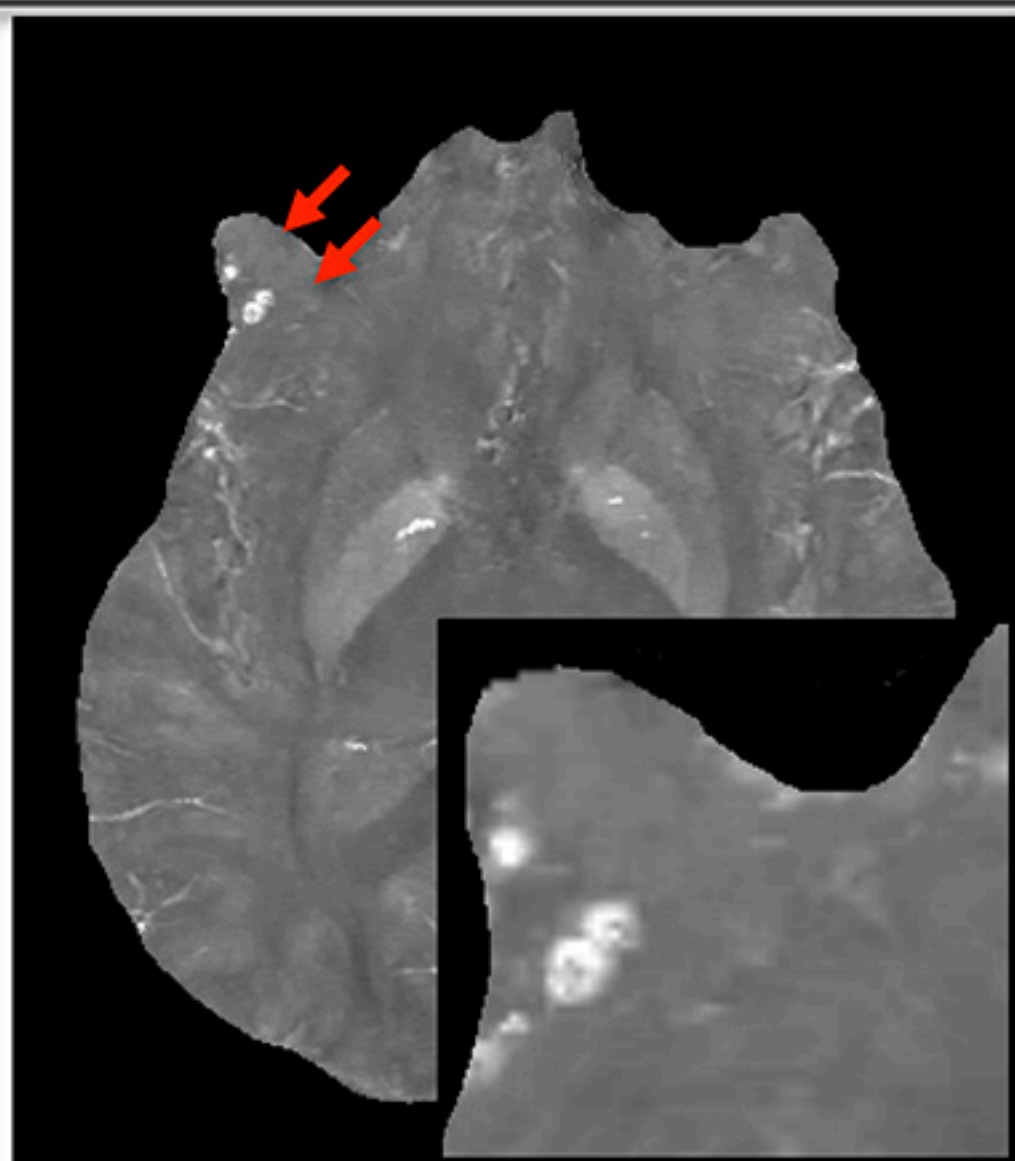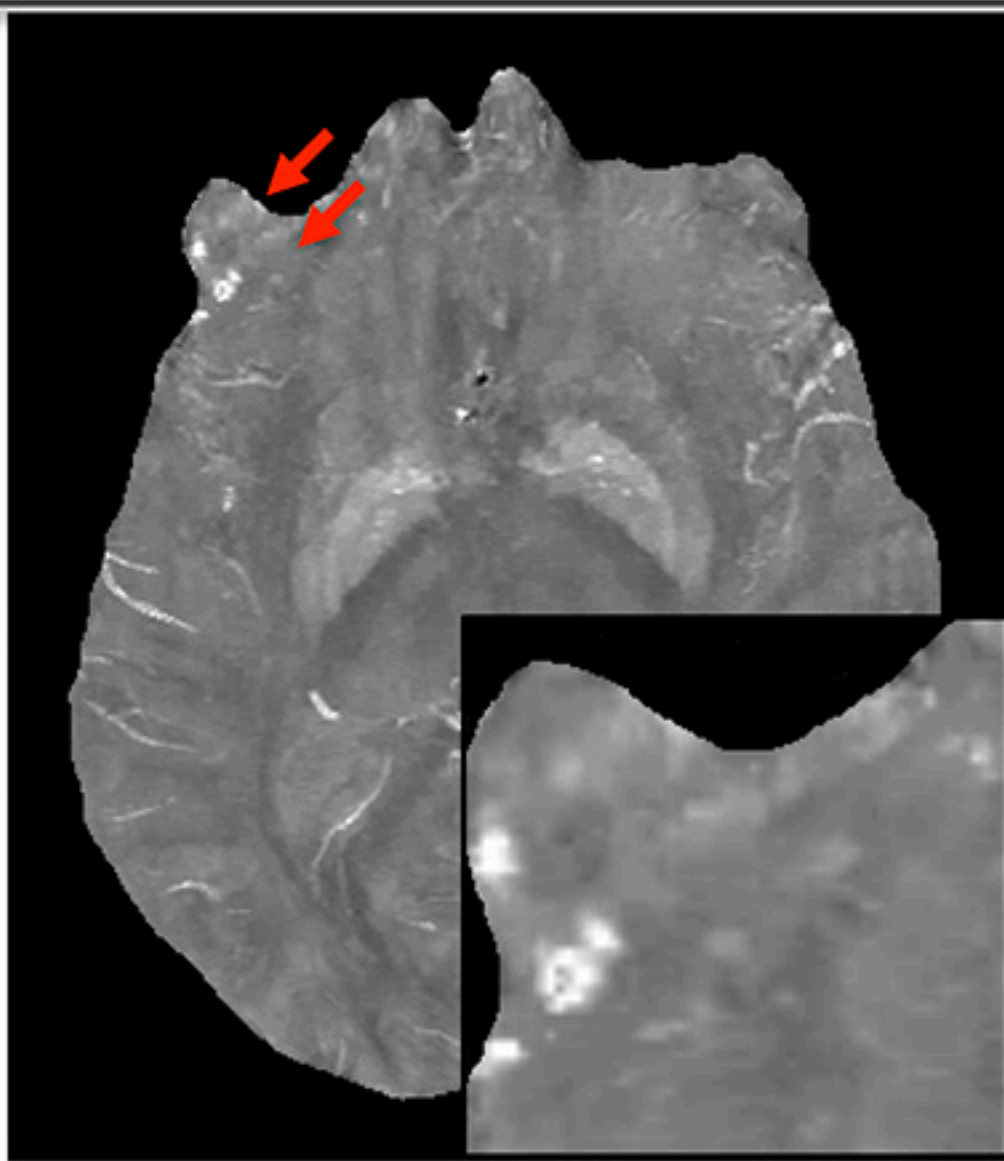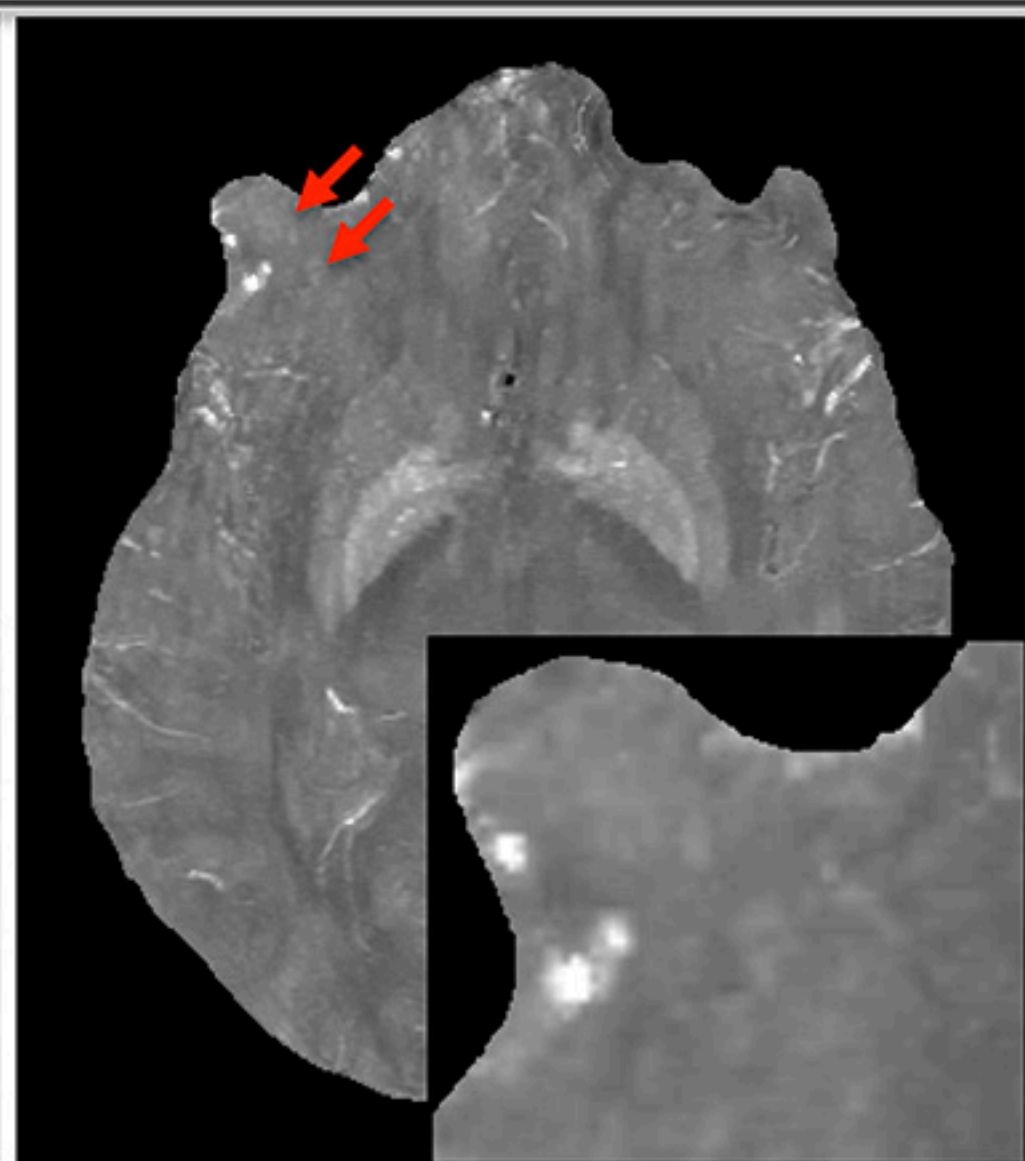

a

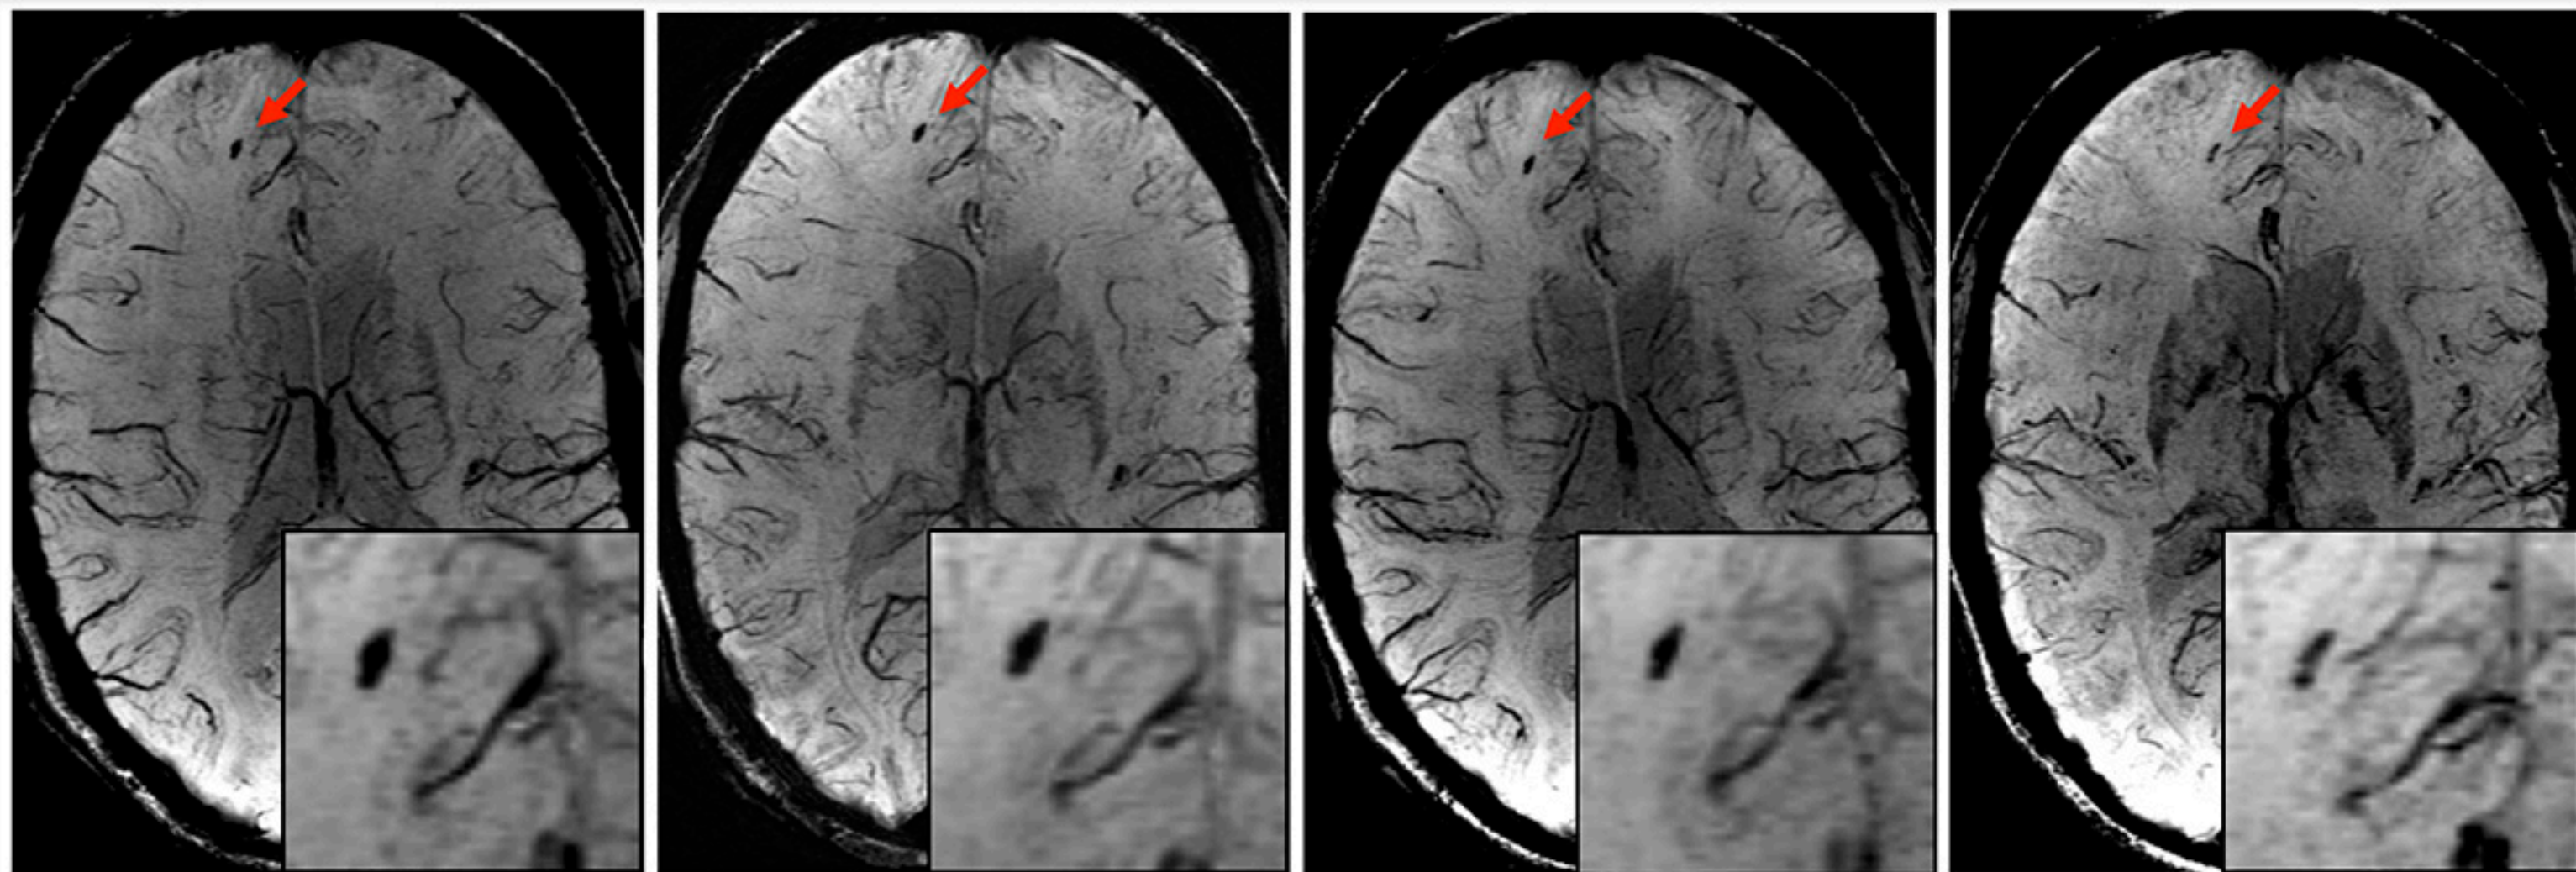

b

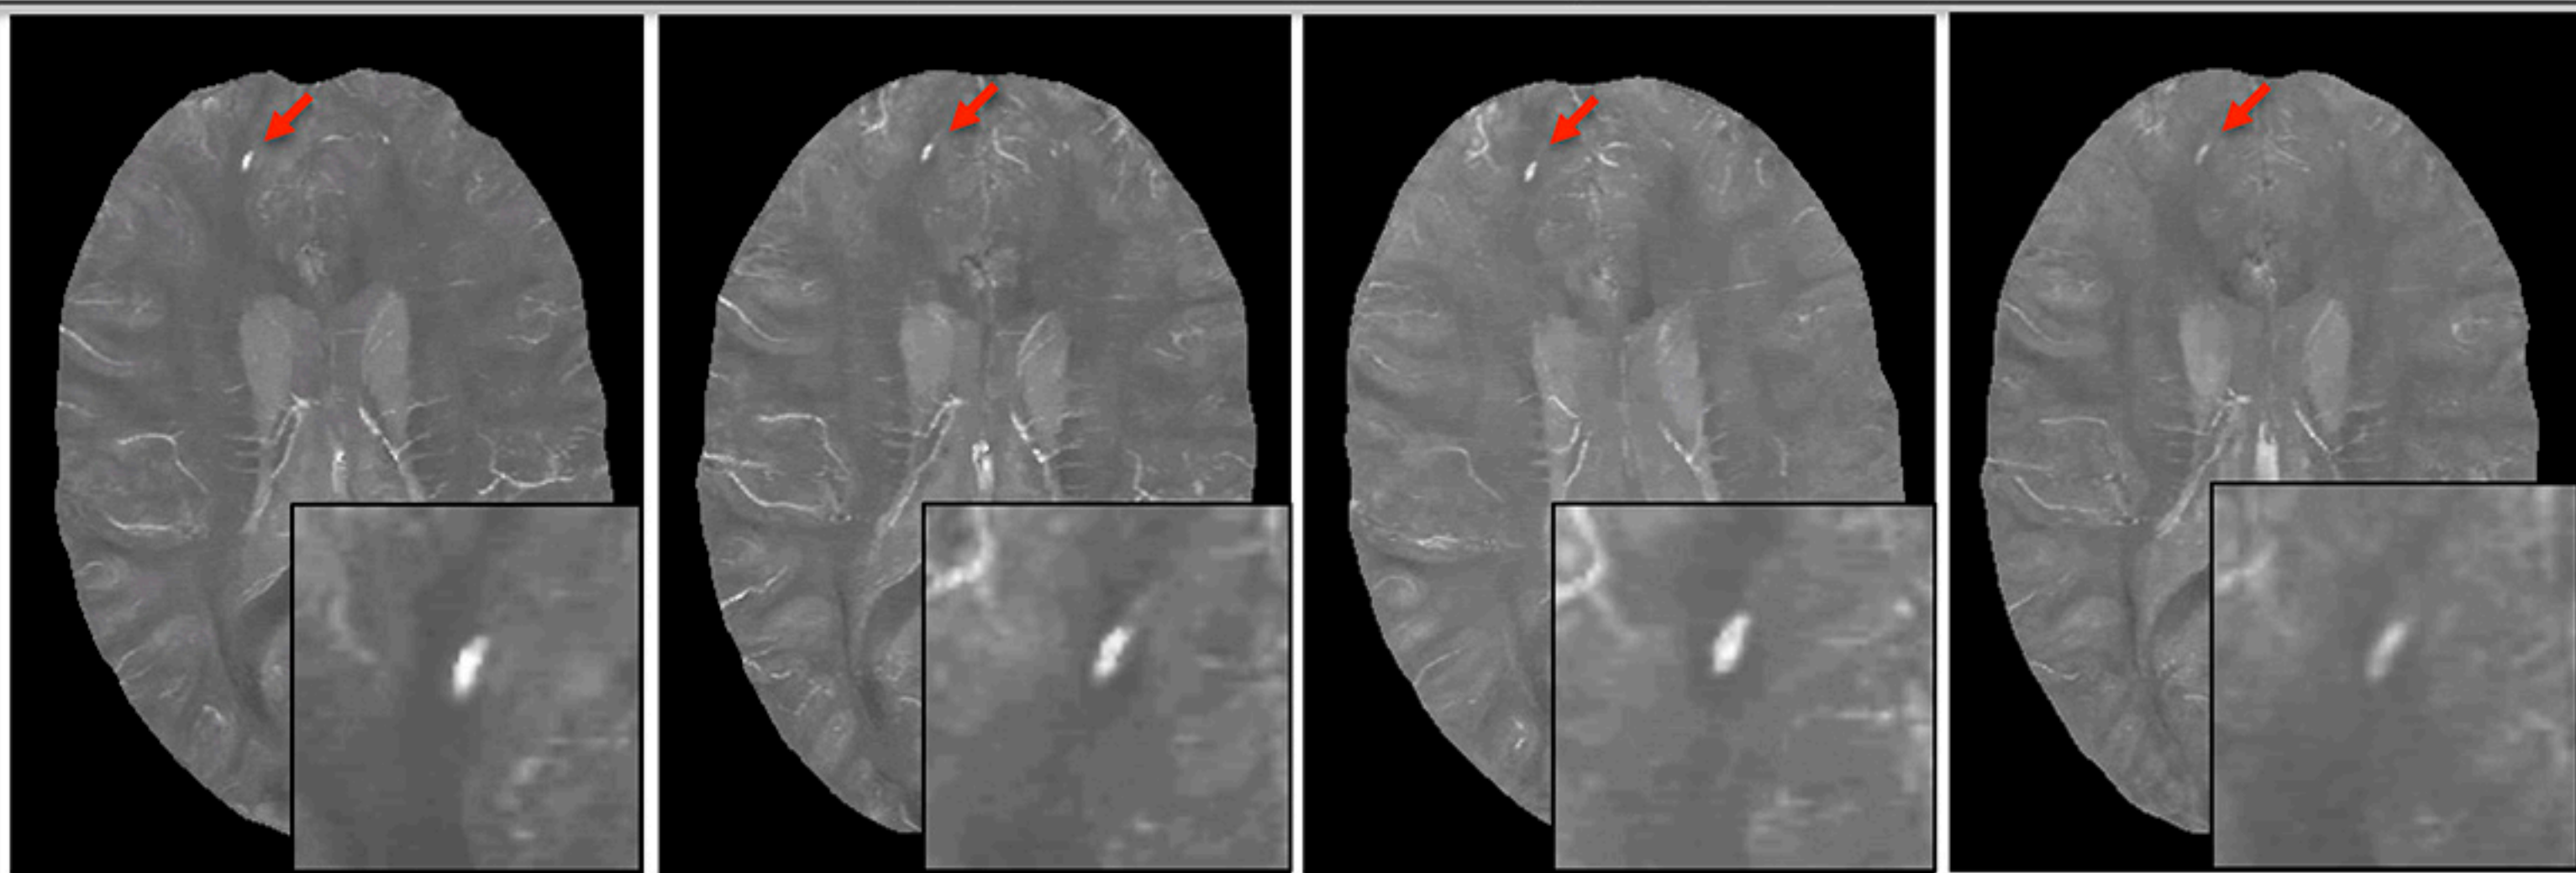

Supplement: NIHMS890198-supplement-Supplemental_Table_and_Figures.pdf [file NIHMS890198-supplement-Supplemental_Table_and_Figures.pdf]
